# Supplementary material for: CCL3 promotes angiogenesis by dysregulation of miR-374b/ VEGF-A axis in human osteosarcoma cells
Source: PubMed Central journal article supplement (PMC4826207; doi:10.18632/oncotarget.6708), 2015-12-21
Supplement: oncotarget-07-4310-s001.pdf [file oncotarget-07-4310-s001.pdf]

## SUPPLEMENTARY FIGURES AND TABLE

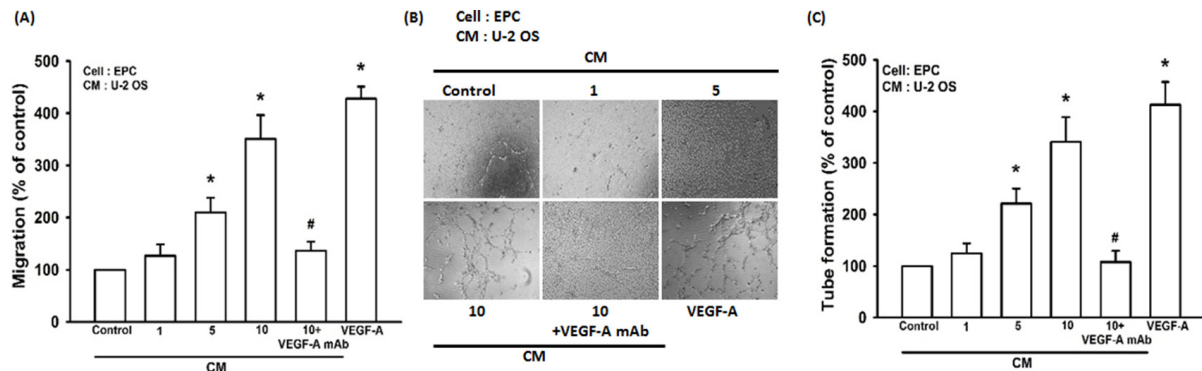

**Supplementary Figure S1: CCL3 enhances angiogenesis by increasing VEGF-A expression in human osteosarcoma cells.** U-2 OS cells were pre-treated for 30 min with VEGF-A antibody (20 ng/mL), followed by stimulation with CCL3 (10 ng/mL) or incubated with CCL3 (1-10 ng/mL) for 24 h. The culture medium was collected as CM and then applied to EPCs for 24 h. The cell migration and capillary-like structure formation in EPCs was examined by Transwell and tube formation assay. Each experiment was done in triplicate. Results are expressed as mean  $\pm$  S.E.M. \* $P < 0.05$  compared with control; # $P < 0.05$  compared with CCL3-treated group.

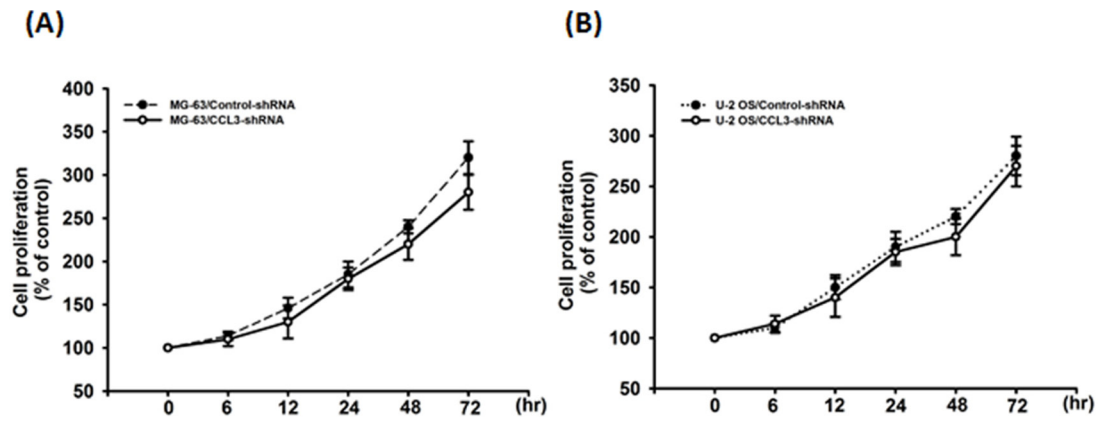

**Supplementary Figure S2: Cell viability of stable expression of Control-shRNA or CCL3-shRNA.** Cells were plated in 96-well plate at a concentration of 2,000 cells per well. After 0, 6, 12, 24, 48, 72 h, cells were collected and the viability was analyzed by using the MTT assay.

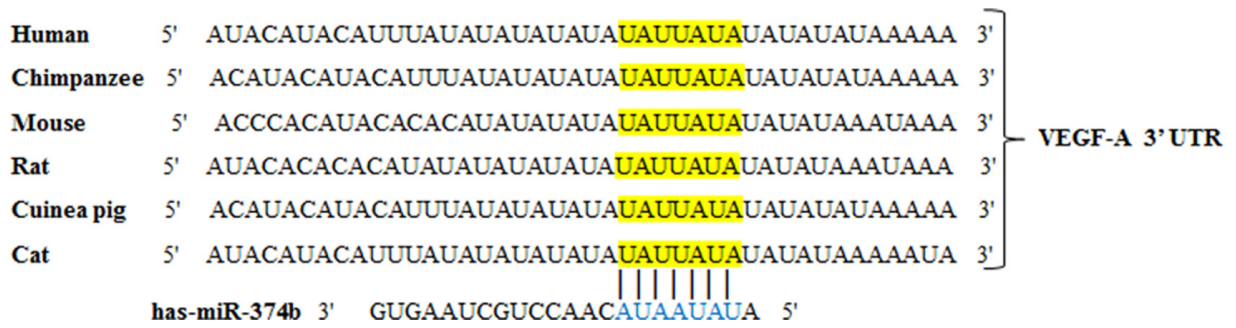

**Supplementary Figure S3: Alignment of miR-374b potential target sites across different species.** MiR-374b species-specifically target on VEGF-A 3' UTR in different species. Note that the miR-374b binding seed region is conserved across species.

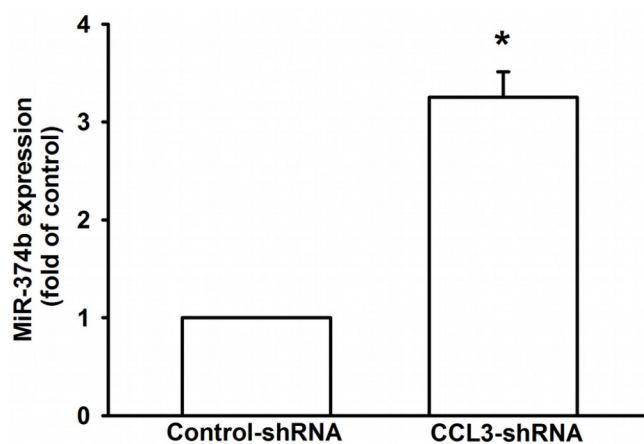

**Supplementary Figure S4: The expression of miR-374b in Control- and CCL3-shRNA stabled cells.** RT-qPCR analysis of miR-374b expression in Control- and CCL3-shRNA stabled cells, and found the miR-374b expression was >3-folds in CCL3-shRNA than Control-shRNA cells.

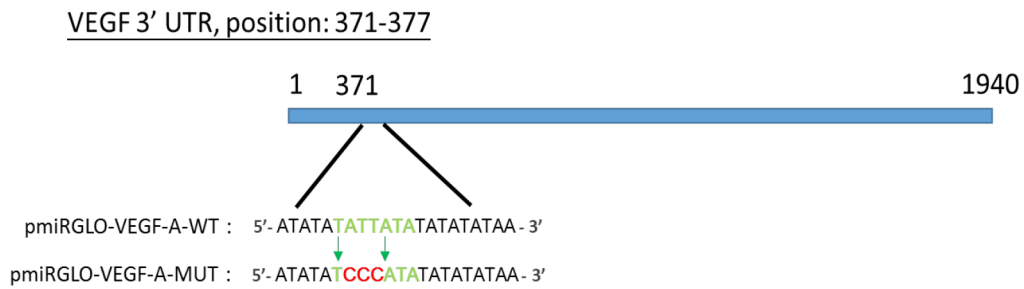

**Supplementary Figure S5: Schematic illustrations of the pmirGLO Dual-Luciferase reporter construct for examining the effect of miR-374b on VEGF-A 3'UTR.** The full-length sequence of the VEGF-A 3'UTR is located at position 1687 of VEGF-A mRNA (NM\_003376). The miR-374b seed location in VEGF-A 3'UTR is 371 to 377. The fragment that contains the predicted miR-374b binding site was cloned into dual-luciferase report plasmid. The construct with the VEGF-A 3'UTR mutated at the predicted miR-374b binding site are also depicted.

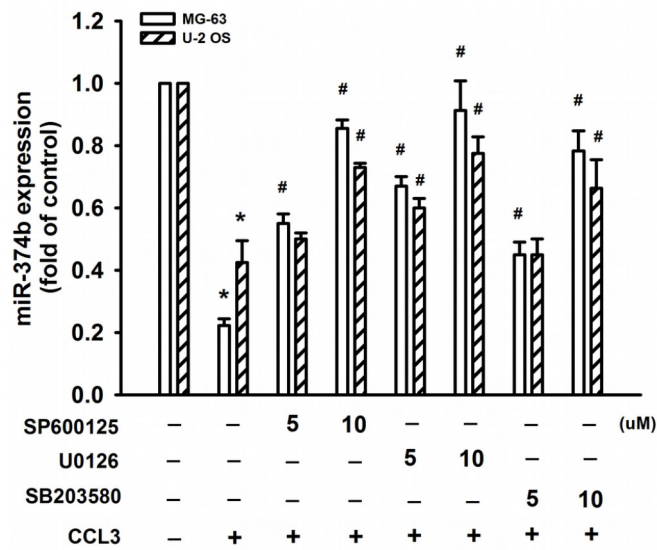

**Supplementary Figure S6: MAPK pathway is involved in CCL3-inhibited miR-374b expression.** Cells were pre-treated with SP600125, U0126, SB203580 for 30 min, then treated cells with CCL3 (10 ng/mL) for 24 h. The miR-374b expression was detected by RT-qPCR.

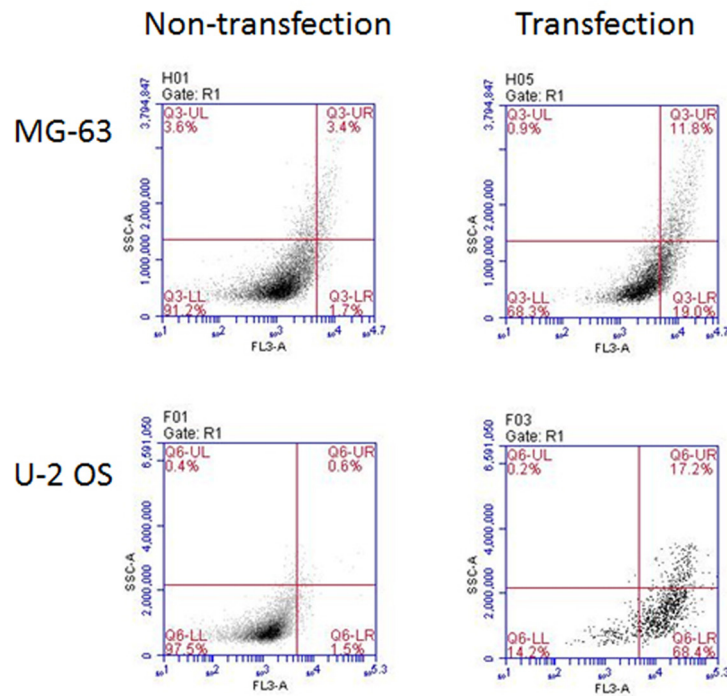

**Supplementary Figure S7: Dye-labeled miRIDIAN mimic transfection controls allow for qualitative evaluation of transfection.** Transfection efficiency for the microRNA mimic was assessed using Dy574-labeled miRNA negative control mimic precursor Dharmacon Research (Lafayette, CO, USA). The transfection effect was evaluated using flow cytometry, and the efficiency of MG-63 and U-2 OS cells were  $40.35\% \pm 10\%$  and  $88.26\% \pm 9\%$  (mean  $\pm$  SD) respectively.

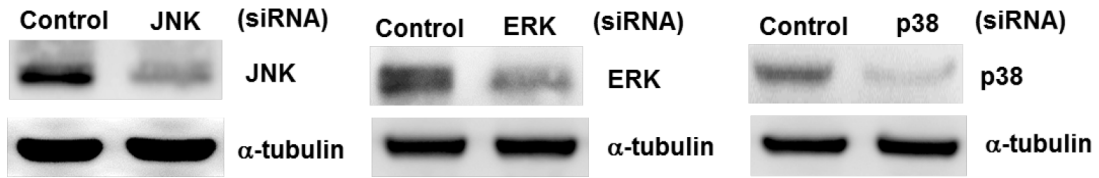

**Supplementary Figure S8: Protein expression of JNK, ERK, and p38 after siRNA transfection.** Cells were seeded in a 6-well plate and then transfected with 100 (nM) of siRNA. After 24 h, cells were collected and the protein expression was detected by western blot.



**Supplementary Table S1: Representative miRNA expression after CCL3 stimulation**

| <b>miRNA name</b> | <b>Fold</b> | <b>miRNA name</b> | <b>Fold</b> |
|-------------------|-------------|-------------------|-------------|
| miR-374b          | 0.113       | miR-29c           | 0.596       |
| miR-127-5p        | 0.216       | miR-206           | 0.632       |
| miR-484           | 0.432       | miR-29b           | 0.646       |
| miR-511           | 0.432       | miR-145           | 0.877       |
| miR-655           | 0.432       | miR-410           | 0.987       |
| miR-519d          | 0.433       | miR-200b          | 1.101       |
| miR-150           | 0.465       | miR-578           | 1.238       |
| miR-93            | 0.465       | miR-200c          | 1.258       |
| miR-134           | 0.465       | miR-300           | 1.467       |
| miR-106a          | 0.495       | miR-24            | 2.127       |
| miR-494           | 0.499       | miR-16            | 2.656       |
| miR-29a           | 0.539       | miR-452           | 2.994       |

RT-qPCR analysis of < 3-fold expression of miRNAs in CCL3 stimulated MG-63 cells.
